# Supplementary material for: Food Addiction as a predictor of binge-eating symptoms in Eating Disorders: prevalence and rehabilitation outcomes in an Italian inpatient population
Source: Research Square preprint supplement (doi:10.21203/rs.3.rs-8562601/v1), 2026-01-22
Supplement: Supplementary file 1 [file 01a7bf3b044648ead648d8c6.docx]

**Supplementary Materials**

| **Table S1. ANCOVA of Y-FAS FSC scores by diagnosis, controlling for BMI, age, and illness duration**   | Source | SS | df | MS | F | *p* | | --- | --- | --- | --- | --- | --- | | Diagnosis | 471.46 | 5 | 94.29 | 11.62 | < .001 | | BMI_T0 | 53.52 | 1 | 53.52 | 6.60 | .012 | | Age | 3.50 | 1 | 3.50 | 0.43 | .513 | | Illness duration | 14.68 | 1 | 14.68 | 1.81 | .181 | | Residuals | 900.73 | 111 | 8.11 | — | — |   *Note.* Y-FAS FSC_T0 = Food Addiction Scale total score at baseline. SS = sum of squares; df = degrees of freedom; MS = mean square; F = F statistic; p = significance value. |  |  |  |  |  |
| --- | --- | --- | --- | --- | --- | --- | --- | --- | --- | --- | --- | --- | --- | --- | --- | --- | --- | --- | --- | --- | --- | --- | --- | --- | --- | --- | --- | --- | --- | --- | --- | --- | --- | --- | --- | --- | --- | --- | --- | --- | --- |

**Post-hoc comparisons for diagnosis (Estimated Marginal Means)**

| **Comparison** | **Mean Difference** | **SE** | **df** | **t** | ***p* (Tukey)** | ***p* (Bonferroni)** | **Cohen’s *d*** |
| --- | --- | --- | --- | --- | --- | --- | --- |
| AN-BP vs AN-R | 3.07 | 0.79 | 111 | 3.89 | .003 | .003 | 1.08 |
| AN-BP vs BED | −3.74 | 1.34 | 111 | −2.78 | .095 | .068 | −1.31 |
| AN-BP vs BN | −3.56 | 1.00 | 111 | −3.56 | .008 | .007 | −1.25 |
| AN-BP vs NAS | 1.75 | 1.21 | 111 | 1.45 | .694 | 1.00 | 0.62 |
| AN-R vs BED | −6.81 | 1.36 | 111 | −5.00 | < .001 | < .001 | −2.39 |
| AN-R vs BN | −6.63 | 0.97 | 111 | −6.81 | < .001 | < .001 | −2.33 |
| AN-R vs NAS | −1.31 | 1.19 | 111 | −1.10 | .879 | 1.00 | −0.46 |
| BED vs BN | 0.18 | 1.07 | 111 | 0.17 | 1.00 | 1.00 | 0.06 |
| BED vs NAS | 5.50 | 1.26 | 111 | 4.35 | < .001 | < .001 | 1.93 |
| BN vs NAS | 5.32 | 1.17 | 111 | 4.56 | < .001 | < .001 | 1.87 |
| *Note.* Comparisons are based on estimated marginal means (EMMeans). SE = standard error; df = degrees of freedom; t = t statistic; p (Tukey) and p (Bonferroni) = significance values adjusted for multiple comparisons; Cohen’s d = effect size. | | | | | | | |

| **Table S2. Spearman’s correlations between Y-FAS 2.0 and SCL-90 subscales** | | | |
| --- | --- | --- | --- |
| **SCL-90 Subscale** | **ρ (Spearman)** | | ***p*** |
| Somatization | .134 | .119 | |
| Obsessive–Compulsive | .206 | .016* | |
| Interpersonal Sensitivity | .208 | .015* | |
| Depression | .123 | .153 | |
| Anxiety | .108 | .211 | |
| Hostility | .192 | .025* | |
| Phobic Anxiety | .184 | .032* | |
| Paranoid Ideation | .218 | .011* | |
| Psychoticism | .229 | .007** | |
| *Note.* *n* = 135. Spearman’s rank correlation coefficients between Y-FAS 2.0 total score and SCL-90 subscales. *p < .05, ** p < .01 | | | |
